# Supplementary material for: Synthesis and sulfide oxidation catalytic activity of a copper monosubstituted Keggin-type polyoxometalate-based supramolecular compound
Source: Royal Society of Chemistry journal article supplement (doi:10.1039/d4nj05286b), 2025-01-01
Supplement: d4nj05286b1.pdf [file d4nj05286b1.pdf]

## Supporting Information

# Synthesis and sulfide oxidation catalytic activity of copper monosubstituted Keggin-type polyoxometalate-based supramolecular compound

Yixuan Zhang,<sup>a</sup> Maochun Zhu,<sup>a</sup> Yifei Liu,<sup>a</sup> Xue Bai,<sup>a</sup> Ange Zhang,<sup>a</sup> Yanli Yang,<sup>a</sup> Bin Li<sup>\*b</sup> and Shuxia Liu<sup>\*a</sup>

<sup>a</sup> Key Laboratory of Polyoxometalate and Reticular Material Chemistry of Ministry of Education, College of Chemistry, Northeast Normal University, Changchun, Jilin 130024, P. R. China.

<sup>b</sup> State Key Laboratory of Luminescence and Applications, Changchun Institute of Optics, Fine Mechanics and Physics, Chinese Academy of Sciences, Changchun 130033, P. R. China.

## 1. Materials and Instrumentations.

**Materials and Instrumentations.** Except for  $\text{K}_5\text{PW}_{11}\text{Cu}(\text{H}_2\text{O})\text{O}_{39}$ , which is synthesized according to literature,<sup>1</sup> all experimental reagents are purchased commercially, and the purity is analytical pure and not further purified; the water used is distilled. Powder X-ray diffraction (PXRD) measurements were performed on a Smartlab instrument with Cu K $\alpha$  radiation ( $\lambda = 1.5418 \text{ \AA}$ ,  $2\theta = 5^\circ\text{-}50^\circ$ , scan rate =  $10^\circ \text{ min}^{-1}$ ). Fourier transform infrared (FT-IR) spectra were collected on an Agilent Technologies Cary 630FT-IR spectrophotometer in the range  $400\text{--}4000 \text{ cm}^{-1}$ . Thermal gravimetric analysis (TGA) was conducted on a TGA 5500 of TA instruments under a nitrogen atmosphere with a heating rate of  $10 \text{ }^\circ\text{C min}^{-1}$  to  $800 \text{ }^\circ\text{C}$ .  $^1\text{H-NMR}$  spectra were recorded on a Bruker Advance 600 (1H: 600 MHz) at ambient temperature. The reactant conversion and product selectivity were monitored by Agilent GC-7820A gas chromatograph. Single-crystal X-ray diffraction (SCXRD) data of compound **1** was collected on the Bruker diffractometer with Mo K $\alpha$  radiation ( $\lambda=0.071073 \text{ nm}$ ) at  $293 \text{ K}$ . Crystal data and structure refinement are summarized in Table S1. The CCDC number for **1** is 2395457, it can be obtained free of charge from The Cambridge Crystallographic Data Centre.

## 2. Supplemental Figures and Tables

**Table S1** Crystallographic data and structure refinement of **1**.

| Compound                                            | <b>1</b>                                                                                                           |
|-----------------------------------------------------|--------------------------------------------------------------------------------------------------------------------|
| Empirical formula                                   | C <sub>144</sub> H <sub>108</sub> Cu <sub>10</sub> N <sub>24</sub> O <sub>166</sub> P <sub>4</sub> W <sub>44</sub> |
| Formula weight                                      | 13681.62                                                                                                           |
| Temperature (K)                                     | 293(2)                                                                                                             |
| Crystal system                                      | triclinic                                                                                                          |
| Space group                                         | P-1                                                                                                                |
| a(Å)                                                | 11.7259(6)                                                                                                         |
| b(Å)                                                | 22.3057(12)                                                                                                        |
| c(Å)                                                | 23.4333(13)                                                                                                        |
| α(°)                                                | 94.292(5)                                                                                                          |
| β(°)                                                | 96.418(5)                                                                                                          |
| γ(°)                                                | 98.299(5)                                                                                                          |
| Volume (Å <sup>3</sup> )                            | 6001.0(6)                                                                                                          |
| Z, ρ <sub>calc</sub> (g/cm <sup>3</sup> )           | 1, 3.786                                                                                                           |
| Radiation                                           | Mo Kα (λ = 0.71073)                                                                                                |
| F (000)                                             | 6075.0                                                                                                             |
| 2θ range (°)                                        | 6.676 to 50                                                                                                        |
|                                                     | -13 ≤ h ≤ 9                                                                                                        |
| index range                                         | -24 ≤ k ≤ 26                                                                                                       |
|                                                     | -27 ≤ l ≤ 23                                                                                                       |
| Reflections collected / unique                      | 36977/20284                                                                                                        |
|                                                     | [Rint = 0.0730]                                                                                                    |
| Data / restraints / parameters                      | 20284/2403/1794                                                                                                    |
| Goodness-of-fit on F <sup>2</sup>                   | 0.900                                                                                                              |
| R <sub>1</sub> , wR <sub>2</sub> [I > 2σ(I)]        | 0.0551, 0.0794                                                                                                     |
| R <sub>1</sub> , wR <sub>2</sub> [all data]         | 0.1075, 0.1011                                                                                                     |
| Largest diff. peak and hole<br>(e Å <sup>-3</sup> ) | 2.40/-1.81                                                                                                         |

$$R_1 = \frac{\sum ||F_o| - |F_c||}{\sum |F_o|}, wR_2 = \left[ \frac{\sum [w (F_o^2 - F_c^2)^2]}{\sum [w (F_o^2)^2]} \right]^{1/2}$$

**Table S2** Selected bond lengths and angles for **1**.

| Bond Lengths (Å) and Angles (°) |           |            |            |
|---------------------------------|-----------|------------|------------|
| Cu1-N9                          | 1.936(5)  | Cu2-N3     | 2.012(4)   |
| Cu1-N10                         | 1.991(4)  | Cu2-N4     | 1.912(4)   |
| Cu1-N11                         | 1.999(5)  | Cu3-N5     | 1.968(5)   |
| Cu1-N12                         | 1.945(5)  | Cu3-N6     | 1.934(5)   |
| Cu2-N1                          | 1.941(4)  | Cu3-N7     | 1.979(5)   |
| Cu2-N2                          | 2.026(5)  | Cu3-N8     | 2.047(5)   |
| Cu2-O3                          | 2.095(13) | Cu3-O43    | 2.415(12)  |
| N4-Cu2-N3                       | 83.36(14) | N9-Cu1-N12 | 155.4(3)   |
| N4-Cu2-N2                       | 98.0(2)   | N9-Cu1-N11 | 102.6(2)   |
| N4-Cu2-O3                       | 92.1(5)   | N9-Cu1-N10 | 83.31(17)  |
| N4-Cu2-N1                       | 177.8(2)  | N5-Cu3-O43 | 78.8(4)    |
| N3-Cu2-N2                       | 122.9(2)  | N5-Cu3-N8  | 101.63(16) |
| N3-Cu2-O3                       | 131.2(6)  | N5-Cu3-N7  | 161.4(3)   |
| N2-Cu2-O3                       | 105.9(6)  | N8-Cu3-O43 | 117.1(4)   |
| N1-Cu2-N3                       | 94.6(2)   | N7-Cu3-O43 | 82.8(3)    |
| N1-Cu2-N2                       | 82.39(17) | N7-Cu3-N8  | 84.32(15)  |
| N1-Cu2-O3                       | 89.8(5)   | N6-Cu3-O43 | 89.6(4)    |
| N12-Cu1-N11                     | 84.65(15) | N6-Cu3-N5  | 82.26(16)  |
| N12-Cu1-N10                     | 101.3(2)  | N6-Cu3-N8  | 153.4(3)   |
| N10-Cu1-N11                     | 152.2(3)  | N6-Cu3-N7  | 100.4(2)   |

**Table S3** Selected hydrogen bond lengths (Å) and bond angles (°) of compound **1**.

| Donor-H...Acceptor | D-H/Å  | H...A/Å | D...A/Å     | D-H...A/° |
|--------------------|--------|---------|-------------|-----------|
| C38-H38...O52      | 0.9308 | 2.6220  | 3.4770(134) | 152.990   |
| C62-H62...O11      | 0.9301 | 2.6646  | 3.0570(15)  | 106.161   |
| C46-H46...O17      | 0.9300 | 2.6540  | 3.4896(151) | 149.853   |

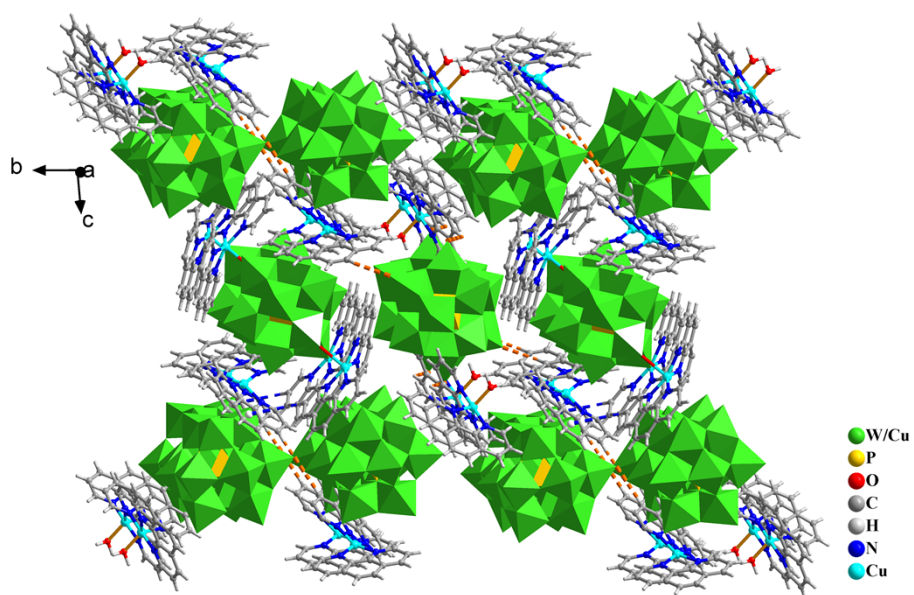

**Fig. S1** The 3D supramolecular stacking structure of compound **1**.

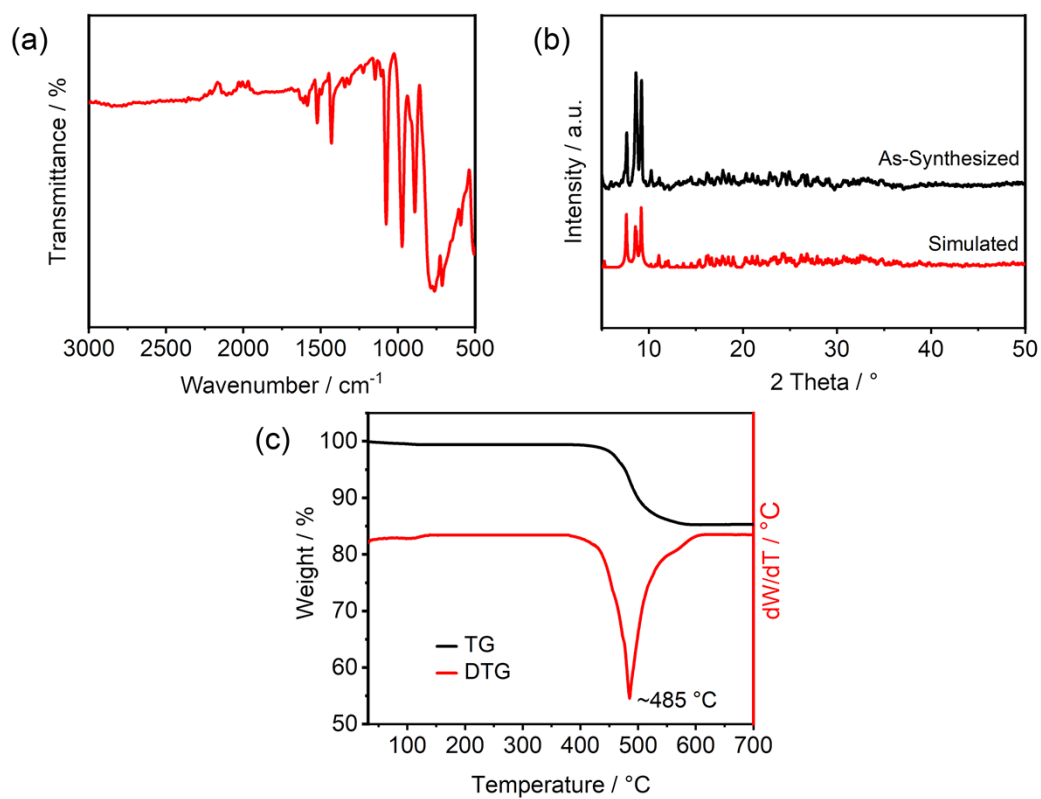

**Fig. S2** (a) The FT-IR spectrum of **1**. (b) The PXRD patterns of **1**. (c) The TG-DTG curves of **1**.

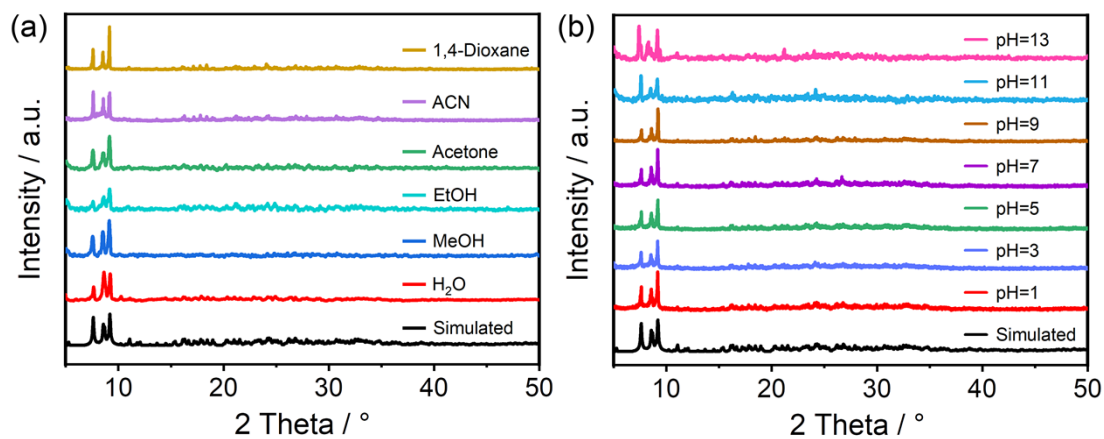

**Fig. S3** (a) PXRD patterns of **1** in different organic solvents for 3 days and (b) different pH values aqueous solutions for 24 h.

**Table S4** Redox potentials of oxidizing agents and sulfides.

| Entry | electric pair | $E^{\theta}/V$ |
|-------|---------------|----------------|
| 1     | $O_2/H_2O$    | 1.229          |
| 2     | $H_2O_2/H_2O$ | 1.776          |
| 3     | MPS/MPSO      | 1.52           |
| 4     | RSH/RSSR      | 0.15           |

$E^{\theta}$  is the redox potential of the oxidizer and sulfide relative to the standard hydrogen electrode.<sup>2</sup>

**Table S5** The performance of different catalytic system in the oxidation of MPS.

| Entry | Catalyst                                                                                                   | Conv.(%) | Sel.(%) |
|-------|------------------------------------------------------------------------------------------------------------|----------|---------|
| 1     | <b>1</b>                                                                                                   | >99      | 96      |
| 2     | —                                                                                                          | 42       | 73      |
| 3     | phen                                                                                                       | 46       | 75      |
| 4     | K <sub>5</sub> PW <sub>11</sub> Cu(H <sub>2</sub> O)O <sub>39</sub>                                        | 90       | 87      |
| 5     | H <sub>3</sub> PW <sub>12</sub> O <sub>40</sub>                                                            | 84       | 45      |
| 6     | Cu(NO <sub>3</sub> ) <sub>2</sub>                                                                          | 75       | 88      |
| 7     | Cu(NO <sub>3</sub> ) <sub>2</sub> with IPA                                                                 | 44       | —       |
| 8     | Cu(NO <sub>3</sub> ) <sub>2</sub> +phen+K <sub>5</sub> PW <sub>11</sub> Cu(H <sub>2</sub> O)O <sub>3</sub> | 92       | 89      |

9

Reaction conditions: MPS (0.2 mmol), 30 % H<sub>2</sub>O<sub>2</sub> (0.6 mmol), MeOH (2 mL), catalyst (2.5 mol%), 50°C, 2h.

**Table S6** Effect of Radical Scavengers on the Oxidation of MPS Catalyzed by **1**.

| Radical scavengers                                             | Time(h) | Conv.(%) |
|----------------------------------------------------------------|---------|----------|
| —                                                              | 2       | >99      |
| <i>p</i> -BQ ( $\cdot\text{O}_2^- / \cdot\text{O}_2\text{H}$ ) | 2       | 98       |
| IPA( $\cdot\text{OH}$ )                                        | 2       | 97.5     |

Reaction conditions: MPS (0.2 mmol), H<sub>2</sub>O<sub>2</sub> (0.6 mmol), **1** (2.5 mol%), radical scavengers (0.2 mmol), MeOH (2 mL), 50°C.

**Table S7** The performance of different catalytic system in the oxidation of mercaptan.

| Entry | Catalyst                                                                                               | Conv.(%) |
|-------|--------------------------------------------------------------------------------------------------------|----------|
| 1     | -                                                                                                      | <2       |
| 2     | <b>1</b>                                                                                               | >99      |
| 3     | Cu(NO <sub>3</sub> ) <sub>2</sub>                                                                      | 60       |
| 4     | H <sub>3</sub> PW <sub>12</sub> O <sub>40</sub>                                                        | 6        |
| 5     | K <sub>5</sub> PW <sub>11</sub> Cu(H <sub>2</sub> O)O <sub>39</sub>                                    | 56       |
| 6     | phen                                                                                                   | <1       |
| 7     | K <sub>5</sub> PW <sub>11</sub> Cu(H <sub>2</sub> O)O <sub>39</sub> +Cu(NO <sub>3</sub> ) <sub>2</sub> | 71       |

Reaction conditions: 2-hydroxy-1-ethanethiol (0.2 mmol), O<sub>2</sub>, ACN (3 mL), Catalyst (4 mol%), 50 °C, 6 h.

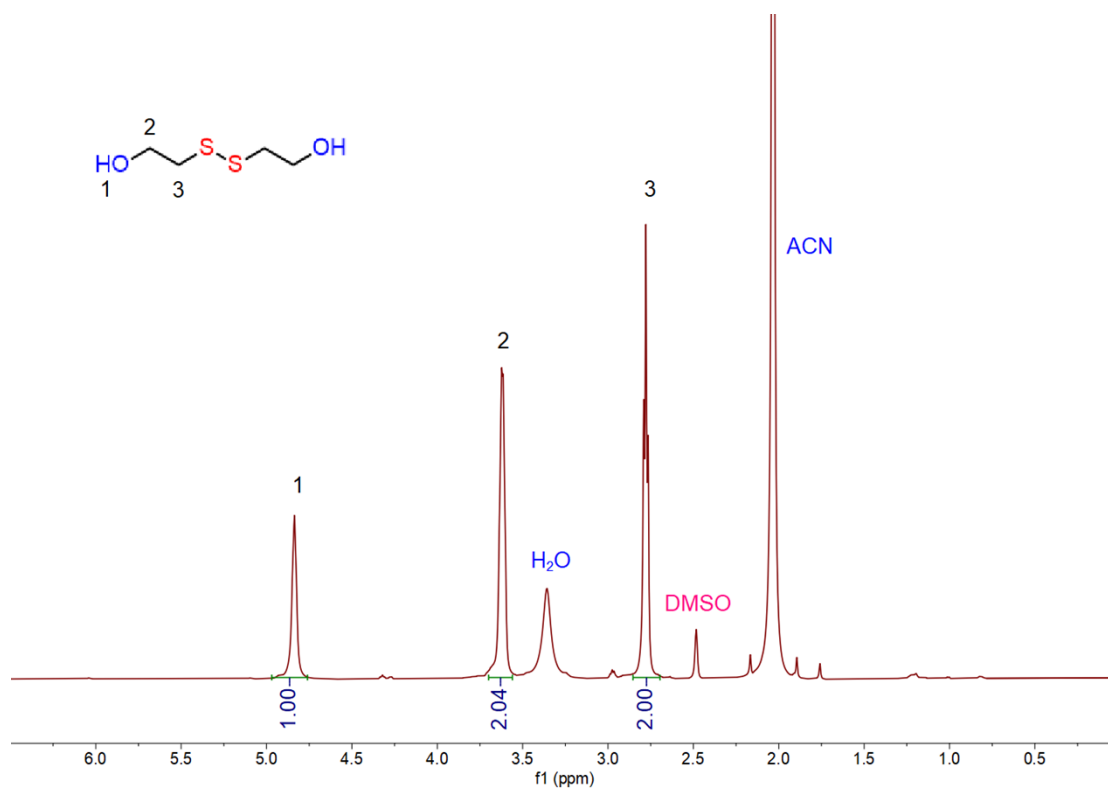

**Fig. S4** <sup>1</sup>H-NMR spectra of 2-hydroxyethyl disulfide, the oxidation product of 2-hydroxy-1-ethanethiol.



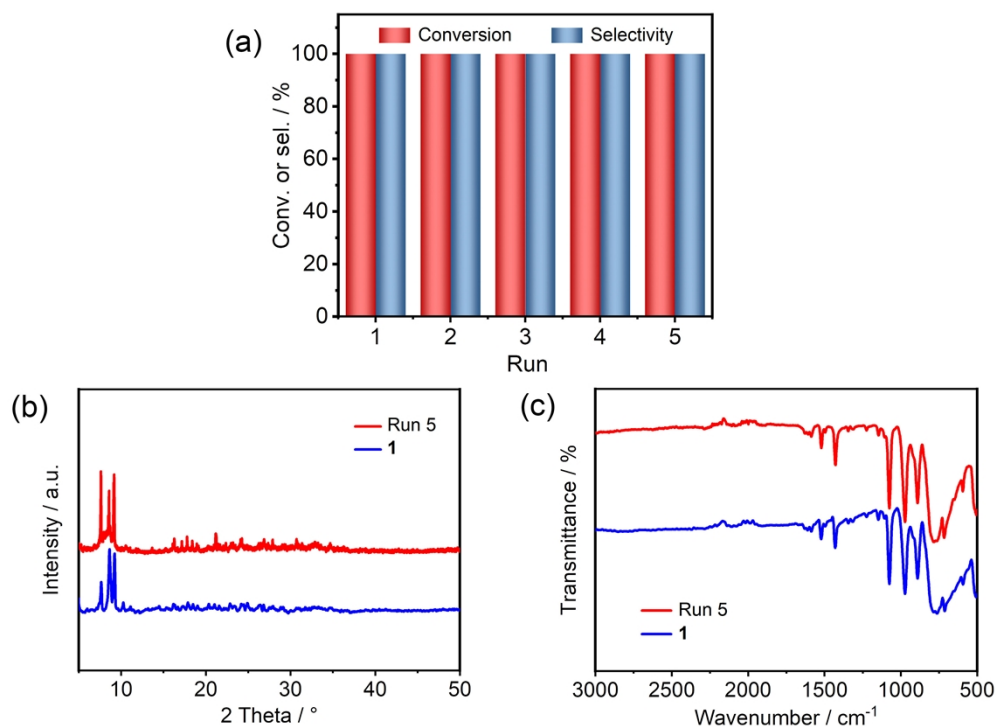

**Fig. S5** (a) Cyclic experiments of mercaptan oxidation catalyzed by **1**. (b) PXRD pattern of **1** before and after cycling. (c) FT-IR spectra of **1** before and after cycling.

## Reference

1. C. M. Tourné, G. F. Tourné, S. A. Malik and T. J. R. Weakley, *J. Inorg. Nucl. Chem.*, 1970, **32**, 3875-3890.
2. R. D. Gall, M. Faraj and C. L. Hill, *Inorg. Chem.*, 1994, **33**, 5015-5021.
